# Supplementary material for: Characterizing basin-scale precipitation gradients in the Third Pole region using a high-resolution atmospheric simulation-based dataset
Source: Copernicus journal article supplement (doi:10.5194/hess-26-4587-2022), 2022-09-14
Supplement: Supplementary file [file hess-26-4587-2022-supplement.pdf]

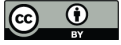

*Supplement of*

## **Characterizing basin-scale precipitation gradients in the Third Pole region using a high-resolution atmospheric simulation-based dataset**

**Yaozhi Jiang et al.**

*Correspondence to:* Kun Yang ([yangk@tsinghua.edu.cn](mailto:yangk@tsinghua.edu.cn))

The copyright of individual parts of the supplement might differ from the article licence.

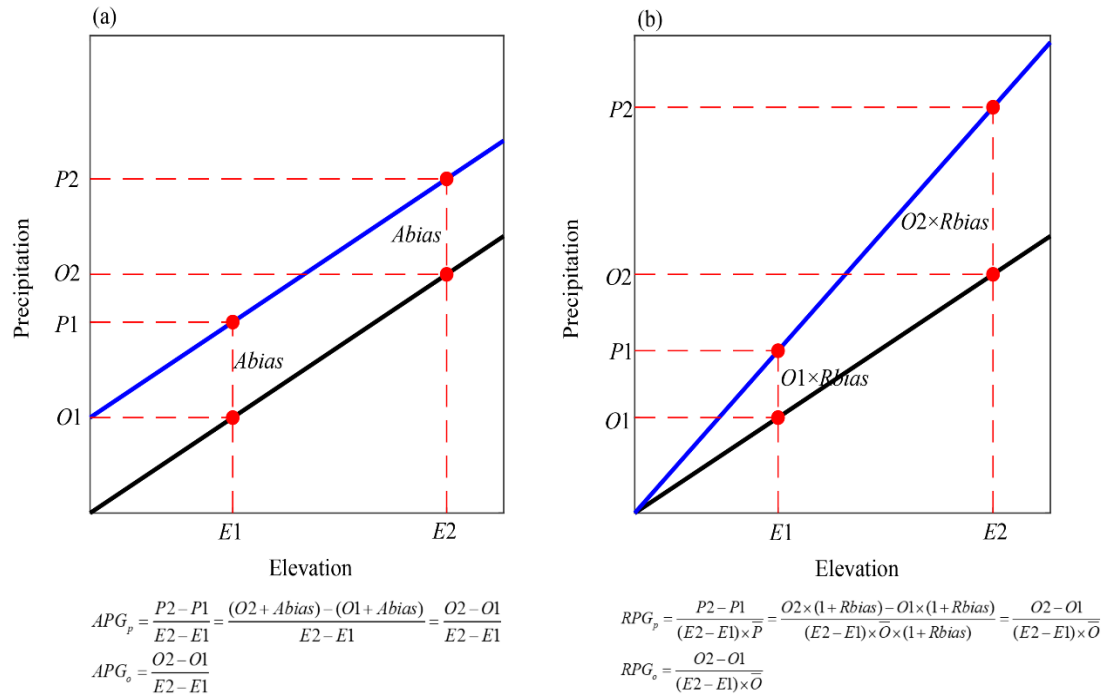

**Figure S1** Schematic of the impact of bias in precipitation product on the calculation of APG and RPG. (a) Precipitation product with spatially homogeneous  $Abias$ . (b) Precipitation product with spatially homogeneous  $Rbias$ .  $O$  and  $P$  represent precipitation from rain gauge data and biased product, respectively.  $E$  is the elevation.  $\bar{O}$  represents the basin-average precipitation amount of rain gauge data. The black and blue lines are the fitted regress lines between elevation and precipitation from rain gauge data and precipitation product, respectively.

**Table S1** Annual and seasonal APG (absolute precipitation gradient) and RPG (relative precipitation gradient, APG divided by basin mean precipitation) for the 388 sub-basins of the TP. NaN denotes there is no data value of APG or RPG for this sub-basin. The Basin ID is corresponding to that in the HydroATLAS database, which can be downloaded from <https://www.hydrosheds.org/page/hydroatlas>.

| Bains ID   | RPG (%. 100 m <sup>-1</sup> ) |        |        |        |        | APG (mm.day <sup>-1</sup> . 100 m <sup>-1</sup> ) |        |        |        |        |
|------------|-------------------------------|--------|--------|--------|--------|---------------------------------------------------|--------|--------|--------|--------|
|            | Annual                        | Winter | Spring | Summer | Autumn | Annual                                            | Winter | Spring | Summer | Autumn |
| 4060050270 | NaN                           | NaN    | NaN    | NaN    | NaN    | NaN                                               | NaN    | NaN    | NaN    | NaN    |
| 4060050280 | 10.10                         | NaN    | 9.42   | 10.79  | 9.76   | 0.041                                             | 0.004  | 0.033  | 0.106  | 0.020  |
| 4060050420 | 6.12                          | NaN    | 5.09   | 6.26   | 6.89   | 0.049                                             | 0.005  | 0.031  | 0.122  | 0.037  |
| 4060050460 | 2.33                          | 6.21   | 4.70   | 2.72   | -1.19  | 0.040                                             | 0.007  | 0.050  | 0.120  | -0.016 |
| 4060050470 | 5.60                          | NaN    | 14.94  | 3.59   | 6.49   | 0.086                                             | 0.019  | 0.099  | 0.153  | 0.074  |
| 4060050500 | 6.32                          | NaN    | 6.12   | 6.18   | 7.04   | 0.044                                             | 0.005  | 0.038  | 0.107  | 0.025  |
| 4060050510 | 6.20                          | NaN    | 3.34   | 6.37   | 8.18   | 0.055                                             | 0.010  | 0.023  | 0.141  | 0.044  |
| 4060050550 | 0.96                          | 1.52   | 0.69   | 1.32   | NaN    | 0.025                                             | 0.004  | 0.013  | 0.079  | NaN    |
| 4060050600 | 9.20                          | 9.38   | 9.02   | 9.02   | 10.32  | 0.057                                             | 0.011  | 0.047  | 0.137  | 0.033  |
| 4060050610 | 5.69                          | NaN    | 11.47  | 5.33   | 4.80   | 0.066                                             | 0.010  | 0.023  | 0.205  | 0.026  |
| 4060050670 | 6.62                          | NaN    | 11.01  | 5.89   | 7.44   | 0.060                                             | 0.016  | 0.020  | 0.171  | 0.030  |
| 4060050700 | 5.71                          | 4.90   | 4.27   | 6.07   | 6.32   | 0.057                                             | 0.007  | 0.033  | 0.151  | 0.036  |
| 4060050710 | 6.82                          | NaN    | 10.57  | 6.31   | 6.95   | 0.091                                             | 0.006  | 0.045  | 0.252  | 0.058  |
| 4060050720 | 6.79                          | 6.39   | 6.93   | 6.73   | 7.00   | 0.051                                             | 0.007  | 0.040  | 0.126  | 0.029  |
| 4060050760 | 15.57                         | NaN    | 15.87  | 14.83  | 16.78  | 0.052                                             | 0.015  | 0.045  | 0.117  | 0.030  |
| 4060050770 | 4.14                          | NaN    | 2.15   | 4.19   | 5.27   | 0.039                                             | 0.009  | 0.014  | 0.105  | 0.029  |
| 4060050780 | 6.25                          | NaN    | 9.88   | 6.06   | 5.58   | 0.073                                             | 0.004  | 0.029  | 0.220  | 0.038  |
| 4060050810 | 5.47                          | 14.78  | 9.01   | 4.74   | 6.02   | 0.046                                             | 0.018  | 0.018  | 0.128  | 0.022  |
| 4060050850 | NaN                           | NaN    | NaN    | NaN    | NaN    | NaN                                               | NaN    | NaN    | NaN    | NaN    |
| 4060050910 | 2.85                          | NaN    | 4.98   | 3.53   | -0.75  | 0.050                                             | 0.003  | 0.034  | 0.172  | -0.010 |
| 4060050950 | 3.85                          | 16.49  | 4.80   | 3.45   | 2.88   | 0.060                                             | 0.026  | 0.043  | 0.134  | 0.037  |
| 4060050980 | 12.16                         | NaN    | 8.15   | 12.99  | 12.58  | 0.114                                             | 0.016  | 0.055  | 0.306  | 0.076  |
| 4060051010 | 4.78                          | 6.35   | 4.85   | 4.66   | 4.85   | 0.111                                             | 0.015  | 0.074  | 0.256  | 0.097  |
| 4060051040 | 4.48                          | NaN    | 6.85   | 4.32   | 4.07   | 0.061                                             | 0.005  | 0.020  | 0.189  | 0.030  |
| 4060051080 | 6.06                          | NaN    | 8.73   | 5.30   | 7.27   | 0.049                                             | 0.008  | 0.032  | 0.126  | 0.029  |
| 4060051120 | 9.06                          | NaN    | 9.41   | 8.09   | 10.68  | 0.039                                             | 0.013  | 0.026  | 0.096  | 0.023  |
| 4060051160 | 6.87                          | 13.22  | 5.46   | 6.96   | 6.85   | 0.086                                             | 0.017  | 0.043  | 0.225  | 0.056  |
| 4060051220 | 6.93                          | NaN    | 10.43  | 6.60   | 6.93   | 0.087                                             | 0.005  | 0.032  | 0.261  | 0.049  |
| 4060051250 | NaN                           | NaN    | NaN    | NaN    | NaN    | NaN                                               | NaN    | NaN    | NaN    | NaN    |
| 4060051270 | 7.18                          | NaN    | 9.42   | 6.58   | 6.90   | 0.078                                             | 0.014  | 0.053  | 0.196  | 0.047  |
| 4060051320 | 6.31                          | NaN    | 6.92   | 6.13   | 5.32   | 0.066                                             | 0.013  | 0.038  | 0.178  | 0.033  |
| 4060051340 | 6.09                          | 15.17  | 6.39   | 5.81   | 5.32   | 0.082                                             | 0.024  | 0.054  | 0.198  | 0.052  |
| 4060051360 | 8.23                          | NaN    | 14.37  | 7.32   | 9.74   | 0.067                                             | 0.007  | 0.033  | 0.189  | 0.040  |
| 4060051460 | 6.25                          | NaN    | 5.89   | 6.31   | 5.84   | 0.071                                             | 0.010  | 0.045  | 0.176  | 0.050  |

---

|            |       |       |       |       |       |       |       |       |       |       |
|------------|-------|-------|-------|-------|-------|-------|-------|-------|-------|-------|
| 4060051480 | 5.15  | NaN   | 6.62  | 4.89  | 4.72  | 0.038 | 0.008 | 0.011 | 0.119 | 0.013 |
| 4060051510 | 11.65 | NaN   | 15.26 | 11.54 | 10.35 | 0.097 | 0.005 | 0.030 | 0.307 | 0.042 |
| 4060051560 | 5.42  | 8.98  | 4.43  | 5.75  | 4.86  | 0.068 | 0.010 | 0.037 | 0.175 | 0.047 |
| 4060051630 | 6.08  | NaN   | 5.62  | 5.95  | 5.94  | 0.054 | 0.011 | 0.031 | 0.143 | 0.031 |
| 4060051700 | 23.16 | NaN   | 21.84 | 24.26 | NaN   | 0.040 | 0.007 | 0.032 | 0.101 | 0.017 |
| 4060051710 | 5.14  | NaN   | 5.19  | 5.14  | 5.00  | 0.024 | 0.004 | 0.023 | 0.059 | 0.010 |
| 4060051740 | 4.86  | 6.97  | 3.64  | 5.13  | 4.77  | 0.054 | 0.010 | 0.029 | 0.143 | 0.032 |
| 4060051760 | 7.95  | NaN   | 8.68  | 7.35  | 8.81  | 0.069 | 0.012 | 0.043 | 0.175 | 0.045 |
| 4060051780 | 7.48  | NaN   | 9.61  | 6.79  | 7.73  | 0.068 | 0.013 | 0.044 | 0.171 | 0.041 |
| 4060051790 | 5.78  | 13.73 | 5.57  | 5.34  | 6.40  | 0.060 | 0.015 | 0.039 | 0.140 | 0.043 |
| 4060051810 | 4.60  | NaN   | 6.02  | 4.55  | 3.55  | 0.082 | 0.010 | 0.045 | 0.220 | 0.051 |
| 4060051820 | 4.77  | 7.49  | 5.39  | 4.66  | 4.04  | 0.060 | 0.009 | 0.050 | 0.147 | 0.032 |
| 4060051940 | 7.06  | 7.17  | 7.53  | 6.60  | 6.97  | 0.040 | 0.030 | 0.054 | 0.050 | 0.027 |
| 4060051950 | 8.64  | NaN   | 16.82 | 7.31  | 10.36 | 0.053 | 0.008 | 0.034 | 0.140 | 0.028 |
| 4060051970 | 6.46  | NaN   | 12.55 | 5.40  | 6.91  | 0.081 | 0.010 | 0.059 | 0.196 | 0.056 |
| 4060052000 | 5.46  | NaN   | 12.75 | 4.34  | 6.52  | 0.036 | 0.008 | 0.026 | 0.090 | 0.018 |
| 4060052050 | 9.38  | 14.22 | 7.28  | 9.50  | 10.30 | 0.099 | 0.018 | 0.053 | 0.256 | 0.069 |
| 4060052120 | 3.45  | 10.88 | 3.88  | 2.95  | 3.61  | 0.035 | 0.013 | 0.027 | 0.075 | 0.023 |
| 4060052240 | 9.92  | 17.06 | 6.96  | 10.30 | 10.12 | 0.108 | 0.019 | 0.047 | 0.293 | 0.070 |
| 4060052250 | 7.25  | 16.96 | 4.91  | 7.48  | 6.98  | 0.088 | 0.021 | 0.035 | 0.241 | 0.052 |
| 4060052300 | 23.20 | NaN   | 24.64 | 21.92 | 26.54 | 0.061 | 0.009 | 0.062 | 0.132 | 0.039 |
| 4060052330 | 5.32  | NaN   | 9.56  | 4.39  | 5.16  | 0.076 | 0.013 | 0.066 | 0.171 | 0.054 |
| 4060052340 | 7.97  | NaN   | 12.17 | 7.56  | 8.02  | 0.068 | 0.006 | 0.024 | 0.210 | 0.031 |
| 4060052350 | 3.52  | 17.23 | 3.03  | 3.60  | 1.91  | 0.049 | 0.021 | 0.024 | 0.132 | 0.019 |
| 4060052370 | 7.79  | NaN   | 6.12  | 8.14  | 6.91  | 0.057 | 0.008 | 0.026 | 0.164 | 0.030 |
| 4060052400 | 6.29  | 7.67  | 7.25  | 6.11  | 6.25  | 0.107 | 0.008 | 0.057 | 0.270 | 0.090 |
| 4060052410 | 6.87  | NaN   | 11.65 | 5.97  | 8.28  | 0.086 | 0.007 | 0.050 | 0.226 | 0.059 |
| 4060052440 | 7.39  | 13.48 | 7.27  | 7.08  | 7.56  | 0.075 | 0.017 | 0.052 | 0.180 | 0.048 |
| 4060052490 | 7.54  | NaN   | 7.69  | 7.57  | 6.92  | 0.107 | 0.007 | 0.043 | 0.307 | 0.070 |
| 4060052510 | 2.97  | 15.26 | 5.46  | 2.50  | 2.08  | 0.057 | 0.021 | 0.046 | 0.124 | 0.035 |
| 4060052520 | 10.51 | 15.38 | 10.46 | 10.11 | 11.31 | 0.099 | 0.017 | 0.072 | 0.242 | 0.064 |
| 4060052590 | 7.29  | NaN   | 10.35 | 6.12  | 8.25  | 0.090 | 0.018 | 0.066 | 0.207 | 0.069 |
| 4060052610 | 5.75  | 6.62  | 5.11  | 5.97  | 5.42  | 0.043 | 0.007 | 0.029 | 0.110 | 0.024 |
| 4060052640 | 8.51  | NaN   | 13.90 | 7.74  | 8.36  | 0.065 | 0.009 | 0.036 | 0.181 | 0.033 |
| 4060052660 | 5.81  | NaN   | 8.70  | 5.52  | 5.43  | 0.049 | 0.007 | 0.016 | 0.154 | 0.017 |
| 4060052680 | 6.32  | NaN   | 11.88 | 5.43  | 6.72  | 0.048 | 0.008 | 0.033 | 0.127 | 0.025 |
| 4060052780 | 6.64  | NaN   | 8.65  | 6.29  | 7.56  | 0.055 | 0.005 | 0.019 | 0.167 | 0.027 |
| 4060052900 | 13.93 | NaN   | 15.63 | 12.70 | NaN   | 0.017 | 0.005 | 0.019 | 0.035 | 0.008 |
| 4060052910 | 5.19  | 18.41 | 5.49  | 4.61  | 5.40  | 0.066 | 0.022 | 0.040 | 0.154 | 0.046 |
| 4060052960 | 10.47 | NaN   | 14.94 | 9.89  | 10.64 | 0.093 | 0.007 | 0.042 | 0.267 | 0.055 |
| 4060052990 | 6.74  | 14.67 | 7.77  | 6.34  | 6.33  | 0.073 | 0.015 | 0.049 | 0.183 | 0.044 |
| 4060053050 | 10.32 | NaN   | 10.75 | 10.07 | 10.20 | 0.106 | 0.014 | 0.051 | 0.288 | 0.068 |
| 4060053240 | 10.36 | NaN   | 20.52 | 9.13  | 10.75 | 0.123 | 0.007 | 0.074 | 0.316 | 0.093 |
| 4060053250 | 8.27  | NaN   | 15.06 | 7.87  | 8.10  | 0.088 | 0.005 | 0.029 | 0.279 | 0.036 |

---

---

|            |       |       |       |       |       |       |        |       |       |       |
|------------|-------|-------|-------|-------|-------|-------|--------|-------|-------|-------|
| 4060053320 | 6.09  | NaN   | 9.03  | 5.94  | 3.99  | 0.043 | 0.009  | 0.018 | 0.133 | 0.011 |
| 4060053370 | 10.33 | 10.44 | 13.57 | 9.51  | 11.23 | 0.064 | 0.040  | 0.035 | 0.141 | 0.040 |
| 4060053490 | 2.90  | 2.16  | 2.52  | 3.44  | 3.30  | 0.019 | 0.014  | 0.015 | 0.038 | 0.010 |
| 4060053530 | 8.51  | NaN   | 7.88  | 8.77  | 7.53  | 0.112 | 0.010  | 0.047 | 0.322 | 0.067 |
| 4060053650 | 6.40  | NaN   | 12.23 | 5.55  | 8.09  | 0.041 | 0.005  | 0.019 | 0.115 | 0.026 |
| 4060053670 | 11.53 | 19.93 | 11.21 | 10.97 | 12.66 | 0.118 | 0.023  | 0.082 | 0.285 | 0.081 |
| 4060053950 | NaN   | NaN   | NaN   | NaN   | NaN   | NaN   | 0.008  | NaN   | NaN   | NaN   |
| 4060054060 | 6.04  | 13.36 | 6.26  | 5.52  | 6.52  | 0.065 | 0.018  | 0.040 | 0.157 | 0.045 |
| 4060054080 | NaN   | NaN   | NaN   | 6.48  | NaN   | 0.004 | -0.001 | 0.003 | 0.014 | NaN   |
| 4060054140 | 4.11  | 6.76  | 3.14  | 4.23  | 4.25  | 0.036 | 0.008  | 0.021 | 0.089 | 0.023 |
| 4060054250 | 8.17  | NaN   | 11.38 | 7.74  | 7.35  | 0.072 | 0.010  | 0.038 | 0.201 | 0.038 |
| 4060054270 | 3.20  | 11.14 | 8.82  | 2.23  | 4.91  | 0.034 | 0.017  | 0.021 | 0.076 | 0.022 |
| 4060054310 | 5.80  | NaN   | 5.88  | 5.20  | 7.05  | 0.021 | 0.007  | 0.018 | 0.045 | 0.012 |
| 4060054350 | 7.08  | NaN   | 6.65  | 6.39  | 9.34  | 0.048 | 0.010  | 0.035 | 0.107 | 0.037 |
| 4060054460 | 6.45  | NaN   | 8.92  | 5.50  | 7.50  | 0.073 | 0.013  | 0.055 | 0.168 | 0.053 |
| 4060054560 | 17.41 | NaN   | 20.00 | 16.22 | NaN   | 0.021 | 0.004  | 0.022 | 0.047 | 0.009 |
| 4060054570 | 6.23  | NaN   | 11.13 | 5.02  | 7.57  | 0.059 | 0.011  | 0.044 | 0.139 | 0.042 |
| 4060054650 | 10.40 | NaN   | 8.37  | 10.91 | 10.25 | 0.079 | 0.008  | 0.046 | 0.213 | 0.048 |
| 4060055030 | 11.19 | NaN   | 15.85 | 9.50  | 13.96 | 0.165 | 0.021  | 0.089 | 0.392 | 0.156 |
| 4060055160 | 10.11 | 7.35  | 7.04  | 11.43 | 8.95  | 0.102 | 0.009  | 0.052 | 0.287 | 0.059 |
| 4060055590 | 9.38  | NaN   | 10.83 | 8.40  | 10.42 | 0.089 | 0.018  | 0.065 | 0.209 | 0.064 |
| 4060055770 | 4.47  | 13.80 | 5.73  | 4.08  | 4.17  | 0.086 | 0.019  | 0.051 | 0.200 | 0.071 |
| 4060055910 | 2.19  | 17.18 | 3.05  | NaN   | 5.68  | 0.015 | 0.020  | 0.017 | NaN   | 0.023 |
| 4060056170 | NaN   | NaN   | 5.45  | NaN   | NaN   | NaN   | -0.004 | 0.007 | NaN   | NaN   |
| 4060056500 | 7.04  | 10.10 | 9.47  | 6.53  | 8.62  | 0.081 | 0.015  | 0.025 | 0.239 | 0.042 |
| 4060056520 | 4.41  | 4.10  | 4.03  | 4.76  | 4.30  | 0.023 | 0.018  | 0.018 | 0.044 | 0.010 |
| 4060056630 | 5.29  | 9.19  | 6.84  | 4.16  | 6.77  | 0.058 | 0.012  | 0.064 | 0.107 | 0.046 |
| 4060056650 | 5.58  | NaN   | 5.95  | 4.78  | 6.50  | 0.040 | 0.014  | 0.034 | 0.084 | 0.029 |
| 4060057150 | 8.24  | 10.30 | 3.04  | 9.40  | 10.88 | 0.076 | 0.012  | 0.025 | 0.200 | 0.065 |
| 4060057790 | 6.91  | NaN   | 7.46  | 5.43  | 9.61  | 0.020 | 0.009  | 0.022 | 0.038 | 0.013 |
| 4060057980 | 6.10  | NaN   | 15.56 | 4.51  | 7.85  | 0.077 | 0.009  | 0.063 | 0.167 | 0.068 |
| 4060061060 | 9.40  | 19.71 | 11.12 | 7.78  | 12.52 | 0.096 | 0.021  | 0.080 | 0.204 | 0.078 |
| 4060061380 | 4.64  | NaN   | 8.89  | 3.57  | 4.52  | 0.084 | 0.024  | 0.071 | 0.172 | 0.068 |
| 4060061740 | 5.77  | 9.29  | 11.06 | 4.03  | 8.20  | 0.028 | 0.024  | 0.015 | 0.052 | 0.020 |
| 4060062620 | 19.99 | NaN   | 19.62 | 19.48 | 22.89 | 0.097 | 0.012  | 0.100 | 0.212 | 0.060 |
| 4060066240 | 5.19  | NaN   | 7.12  | 3.97  | 6.89  | 0.087 | 0.018  | 0.063 | 0.173 | 0.092 |
| 4060435200 | 3.91  | 1.80  | 3.16  | 4.17  | 4.04  | 0.048 | 0.002  | 0.028 | 0.133 | 0.029 |
| 4060437450 | 6.19  | 3.82  | 5.29  | 6.61  | 6.54  | 0.045 | 0.006  | 0.033 | 0.119 | 0.024 |
| 4060442160 | 10.25 | NaN   | 9.78  | 10.97 | 9.75  | 0.049 | 0.005  | 0.040 | 0.127 | 0.025 |
| 4060443530 | 1.34  | 3.47  | 1.09  | 1.22  | 1.88  | 0.014 | 0.004  | 0.010 | 0.031 | 0.011 |
| 4060444460 | 9.79  | NaN   | 8.95  | 10.42 | 9.84  | 0.043 | 0.006  | 0.033 | 0.112 | 0.020 |
| 4060445400 | 2.28  | 1.72  | 1.64  | 2.72  | 1.24  | 0.034 | 0.002  | 0.017 | 0.103 | 0.011 |
| 4060445600 | 3.36  | NaN   | 2.30  | 4.14  | 2.33  | 0.059 | NaN    | 0.029 | 0.172 | 0.032 |
| 4060449810 | 6.08  | 5.11  | 5.87  | 6.24  | 6.38  | 0.020 | 0.005  | 0.019 | 0.047 | 0.010 |

---

---

|            |       |       |       |       |       |        |        |        |        |        |
|------------|-------|-------|-------|-------|-------|--------|--------|--------|--------|--------|
| 4060449990 | 5.56  | 3.12  | 5.45  | 5.85  | 5.43  | 0.034  | 0.004  | 0.032  | 0.084  | 0.014  |
| 4060465510 | 1.83  | 4.08  | NaN   | 2.68  | 0.79  | 0.016  | 0.011  | NaN    | 0.046  | 0.005  |
| 4060468730 | -1.40 | 1.67  | -2.42 | -1.64 | NaN   | -0.013 | 0.003  | -0.021 | -0.034 | NaN    |
| 4060469570 | 1.60  | NaN   | NaN   | 2.00  | NaN   | 0.020  | 0.002  | NaN    | 0.063  | NaN    |
| 4060469680 | NaN   | NaN   | -1.07 | NaN   | -1.13 | NaN    | 0.002  | -0.009 | NaN    | -0.008 |
| 4060474830 | 9.22  | 8.38  | 8.97  | 9.26  | 10.06 | 0.072  | 0.012  | 0.074  | 0.171  | 0.030  |
| 4060476110 | 5.75  | 3.83  | 5.24  | 6.13  | 5.70  | 0.045  | 0.006  | 0.039  | 0.112  | 0.020  |
| 4060480310 | 3.82  | 2.34  | 3.27  | 4.94  | 4.01  | 0.044  | 0.018  | 0.048  | 0.079  | 0.030  |
| 4060480370 | 0.94  | 1.42  | 0.72  | NaN   | 1.24  | 0.015  | 0.022  | 0.016  | NaN    | 0.015  |
| 4060484110 | 0.74  | 2.99  | NaN   | 0.51  | 2.09  | 0.007  | 0.005  | NaN    | 0.012  | 0.010  |
| 4060486210 | 4.06  | 4.22  | 3.87  | 4.21  | 3.77  | 0.087  | 0.011  | 0.061  | 0.206  | 0.070  |
| 4060486310 | 2.11  | 1.08  | 1.59  | 2.55  | 1.28  | 0.045  | 0.002  | 0.023  | 0.133  | 0.021  |
| 4060487390 | 8.40  | NaN   | 7.59  | 10.45 | 6.15  | 0.086  | NaN    | 0.077  | 0.197  | 0.063  |
| 4060487510 | 5.75  | NaN   | 4.31  | 7.50  | 3.68  | 0.095  | NaN    | 0.066  | 0.257  | 0.053  |
| 4060487520 | 2.61  | 2.04  | 1.71  | 3.50  | 0.82  | 0.037  | 0.005  | 0.018  | 0.114  | 0.008  |
| 4060487530 | 9.96  | NaN   | 9.57  | 11.81 | 7.53  | 0.102  | NaN    | 0.098  | 0.238  | 0.070  |
| 4060491870 | 3.88  | 3.13  | 3.58  | 4.82  | 4.68  | 0.112  | 0.101  | 0.151  | 0.107  | 0.091  |
| 4060492070 | -0.87 | -1.31 | -1.57 | 0.63  | -0.56 | -0.028 | -0.046 | -0.069 | 0.016  | -0.013 |
| 4060492110 | 3.74  | 4.62  | 2.94  | 4.28  | 3.07  | 0.052  | 0.006  | 0.040  | 0.130  | 0.032  |
| 4060492120 | -1.51 | NaN   | -2.47 | -0.94 | -2.61 | -0.020 | NaN    | -0.024 | -0.029 | -0.025 |
| 4060492490 | NaN   | NaN   | NaN   | NaN   | NaN   | NaN    | NaN    | NaN    | NaN    | NaN    |
| 4060501850 | 2.00  | 4.22  | 1.63  | 1.85  | 2.90  | 0.024  | 0.009  | 0.021  | 0.052  | 0.015  |
| 4060502020 | 3.96  | 4.72  | 3.27  | 4.01  | 4.86  | 0.041  | 0.010  | 0.034  | 0.095  | 0.025  |
| 4060505610 | NaN   | 0.98  | -1.38 | NaN   | 1.34  | NaN    | 0.001  | -0.008 | NaN    | 0.006  |
| 4060505620 | 3.93  | 8.15  | 3.43  | 3.67  | 5.28  | 0.046  | 0.012  | 0.042  | 0.102  | 0.027  |
| 4060508720 | 3.68  | 3.25  | 3.53  | 4.48  | 4.00  | 0.043  | 0.049  | 0.057  | 0.035  | 0.033  |
| 4060508830 | 5.11  | 8.47  | 6.30  | 2.25  | 6.14  | 0.039  | 0.046  | 0.054  | 0.026  | 0.031  |
| 4060508980 | 3.50  | 5.88  | 3.38  | 3.41  | 3.65  | 0.039  | 0.006  | 0.036  | 0.086  | 0.029  |
| 4060510850 | 4.11  | NaN   | 3.60  | 3.94  | 5.11  | 0.042  | 0.007  | 0.040  | 0.089  | 0.033  |
| 4060514390 | 2.25  | 8.07  | 4.15  | 2.09  | NaN   | 0.050  | 0.015  | 0.059  | 0.118  | NaN    |
| 4060514580 | 4.45  | 8.50  | 4.25  | 4.56  | 3.80  | 0.099  | 0.014  | 0.060  | 0.261  | 0.061  |
| 4060515470 | -2.05 | NaN   | -2.55 | -2.12 | -2.46 | -0.012 | 0.003  | -0.011 | -0.031 | -0.007 |
| 4060515600 | 0.29  | NaN   | -0.69 | 0.57  | NaN   | 0.003  | 0.003  | -0.005 | 0.012  | NaN    |
| 4060516010 | 7.19  | 11.30 | 7.74  | 6.86  | 7.38  | 0.155  | 0.019  | 0.110  | 0.372  | 0.116  |
| 4060516300 | 5.99  | 10.60 | 6.40  | 5.94  | 5.38  | 0.136  | 0.017  | 0.091  | 0.348  | 0.085  |
| 4060520570 | 1.25  | 1.63  | 1.13  | NaN   | 1.45  | 0.033  | 0.051  | 0.040  | NaN    | 0.028  |
| 4060520710 | 3.77  | 3.81  | 3.44  | 4.25  | 3.88  | 0.088  | 0.109  | 0.113  | 0.070  | 0.060  |
| 4060523580 | 2.70  | 7.89  | 3.03  | 1.97  | 2.53  | 0.022  | 0.018  | 0.022  | 0.036  | 0.014  |
| 4060523690 | -1.20 | 7.09  | 1.52  | -4.45 | -2.05 | -0.011 | 0.034  | 0.013  | -0.078 | -0.012 |
| 4060528370 | 2.77  | 2.57  | 2.04  | 2.82  | 3.86  | 0.025  | 0.004  | 0.015  | 0.064  | 0.017  |
| 4060528470 | NaN   | 2.87  | NaN   | NaN   | 2.18  | NaN    | 0.005  | NaN    | NaN    | 0.011  |
| 4060533250 | 3.85  | 3.72  | 3.39  | 5.14  | 3.81  | 0.095  | 0.107  | 0.125  | 0.085  | 0.064  |
| 4060533260 | NaN   | NaN   | NaN   | NaN   | NaN   | NaN    | NaN    | NaN    | NaN    | NaN    |
| 4060534300 | 1.36  | 0.90  | 0.76  | 3.32  | 1.51  | 0.016  | 0.013  | 0.013  | 0.026  | 0.013  |

---

---

|            |       |       |       |       |       |        |        |        |       |        |
|------------|-------|-------|-------|-------|-------|--------|--------|--------|-------|--------|
| 4060534460 | 1.98  | 2.26  | 1.95  | 1.35  | 2.05  | 0.029  | 0.037  | 0.047  | 0.010 | 0.021  |
| 4060536470 | 3.83  | 7.40  | 4.01  | 3.47  | 4.33  | 0.048  | 0.008  | 0.048  | 0.099 | 0.035  |
| 4060536590 | 0.88  | 2.82  | -0.69 | 1.25  | 1.13  | 0.009  | 0.003  | -0.006 | 0.031 | 0.007  |
| 4060540620 | 1.60  | 1.44  | 1.02  | 3.97  | 1.74  | 0.067  | 0.074  | 0.071  | 0.074 | 0.049  |
| 4060540630 | 1.24  | 1.17  | 0.52  | 2.60  | 1.67  | 0.036  | 0.040  | 0.023  | 0.048 | 0.033  |
| 4060542530 | 2.98  | 9.84  | 1.79  | 2.56  | 5.18  | 0.030  | 0.010  | 0.013  | 0.067 | 0.030  |
| 4060542660 | 1.66  | 5.10  | 0.82  | 1.33  | 3.36  | 0.014  | 0.006  | 0.005  | 0.030 | 0.017  |
| 4060544080 | -0.24 | 0.91  | -1.30 | 0.40  | NaN   | -0.004 | 0.013  | -0.032 | 0.004 | NaN    |
| 4060548960 | 5.08  | 5.22  | 4.75  | 5.03  | 5.62  | 0.049  | 0.042  | 0.063  | 0.048 | 0.041  |
| 4060549210 | 4.19  | 4.97  | 3.91  | 3.79  | 4.37  | 0.049  | 0.049  | 0.067  | 0.038 | 0.040  |
| 4060549440 | 9.03  | 8.70  | 8.92  | 8.85  | 9.79  | 0.064  | 0.009  | 0.053  | 0.144 | 0.051  |
| 4060549450 | 15.63 | NaN   | 16.90 | 14.31 | 19.07 | 0.051  | 0.008  | 0.045  | 0.113 | 0.038  |
| 4060549810 | 3.06  | 3.97  | 3.08  | 2.22  | 3.13  | 0.039  | 0.042  | 0.054  | 0.028 | 0.032  |
| 4060550020 | 2.77  | 4.62  | 3.39  | NaN   | 2.30  | 0.031  | 0.042  | 0.052  | NaN   | 0.020  |
| 4060554780 | -0.33 | 0.44  | -1.38 | 1.81  | NaN   | -0.005 | 0.006  | -0.043 | 0.015 | NaN    |
| 4060554970 | 6.04  | 4.38  | 5.71  | 9.45  | 6.99  | 0.119  | 0.060  | 0.267  | 0.077 | 0.071  |
| 4060559100 | 16.40 | NaN   | 19.19 | 14.25 | 20.56 | 0.062  | 0.016  | 0.055  | 0.136 | 0.042  |
| 4060559110 | 10.25 | 10.26 | 10.45 | 9.84  | 11.29 | 0.073  | 0.014  | 0.058  | 0.161 | 0.060  |
| 4060559760 | NaN   | NaN   | NaN   | NaN   | NaN   | NaN    | NaN    | NaN    | NaN   | NaN    |
| 4060559970 | 7.42  | 7.92  | 7.74  | 7.09  | 7.97  | 0.062  | 0.010  | 0.051  | 0.134 | 0.051  |
| 4060563950 | 2.81  | 2.70  | 2.97  | 3.19  | 1.89  | 0.067  | 0.007  | 0.055  | 0.160 | 0.046  |
| 4060571560 | 1.46  | 1.32  | 0.38  | 2.53  | -0.49 | 0.037  | 0.003  | 0.007  | 0.147 | -0.011 |
| 4060571960 | 2.72  | 4.00  | 1.81  | 3.61  | 1.36  | 0.055  | 0.007  | 0.028  | 0.156 | 0.027  |
| 4060573250 | 6.26  | 6.08  | 5.58  | 6.07  | 7.63  | 0.070  | 0.018  | 0.049  | 0.148 | 0.063  |
| 4060573460 | 4.45  | 3.98  | 4.03  | 4.39  | 5.10  | 0.063  | 0.011  | 0.043  | 0.135 | 0.060  |
| 4060575240 | 1.85  | 2.02  | 1.85  | 0.89  | 1.96  | 0.024  | 0.035  | 0.041  | 0.004 | 0.018  |
| 4060575490 | 4.35  | 4.06  | 3.60  | 5.48  | 5.10  | 0.080  | 0.076  | 0.098  | 0.073 | 0.071  |
| 4060575620 | NaN   | NaN   | NaN   | NaN   | NaN   | NaN    | NaN    | NaN    | NaN   | NaN    |
| 4060578950 | 5.65  | NaN   | 3.49  | 6.69  | 4.83  | 0.066  | NaN    | 0.025  | 0.191 | 0.049  |
| 4060579340 | 8.05  | NaN   | 8.47  | 8.19  | 7.44  | 0.099  | 0.007  | 0.068  | 0.231 | 0.087  |
| 4060585650 | 2.27  | -0.71 | 1.79  | 3.14  | 1.45  | 0.054  | -0.002 | 0.036  | 0.142 | 0.037  |
| 4060588530 | 3.73  | 5.00  | 3.79  | 4.17  | 2.60  | 0.057  | 0.006  | 0.043  | 0.139 | 0.039  |
| 4060588650 | 0.87  | -0.63 | NaN   | 2.35  | -1.22 | 0.023  | -0.002 | NaN    | 0.123 | -0.033 |
| 4060589340 | 3.52  | 3.49  | 3.74  | 3.70  | 3.02  | 0.063  | 0.006  | 0.053  | 0.133 | 0.058  |
| 4060589460 | 3.69  | 6.71  | 4.22  | 3.51  | 3.48  | 0.055  | 0.008  | 0.045  | 0.121 | 0.044  |
| 4060589470 | 2.64  | 7.38  | 3.78  | 2.40  | 1.97  | 0.044  | 0.009  | 0.045  | 0.093 | 0.030  |
| 4060589480 | 1.67  | 3.04  | 2.11  | 1.56  | 1.39  | 0.041  | 0.008  | 0.042  | 0.076 | 0.036  |
| 4060590330 | 0.31  | 0.92  | NaN   | NaN   | 0.30  | 0.007  | 0.022  | NaN    | NaN   | 0.005  |
| 4060590440 | 1.37  | 1.75  | 1.32  | 1.18  | 1.24  | 0.048  | 0.057  | 0.061  | 0.042 | 0.032  |
| 4060594480 | 2.49  | 2.56  | 1.88  | 4.44  | 3.30  | 0.034  | 0.035  | 0.053  | 0.023 | 0.025  |
| 4060594670 | 3.62  | 3.90  | 2.89  | 5.64  | 4.30  | 0.036  | 0.040  | 0.058  | 0.024 | 0.021  |
| 4060595920 | NaN   | NaN   | NaN   | 1.13  | NaN   | NaN    | NaN    | NaN    | 0.049 | NaN    |
| 4060596060 | 1.59  | 1.02  | 0.93  | 2.83  | 1.84  | 0.070  | 0.046  | 0.053  | 0.130 | 0.049  |
| 4060598330 | 2.35  | 5.23  | 1.63  | 2.57  | 1.92  | 0.049  | 0.012  | 0.023  | 0.128 | 0.032  |

---

---

|            |       |       |       |       |       |        |        |        |        |        |
|------------|-------|-------|-------|-------|-------|--------|--------|--------|--------|--------|
| 4060598730 | 4.94  | 7.78  | 4.75  | 5.02  | 4.59  | 0.070  | 0.008  | 0.046  | 0.172  | 0.051  |
| 4060603550 | 1.89  | 4.77  | 0.56  | 2.18  | 1.67  | 0.038  | 0.015  | 0.008  | 0.098  | 0.031  |
| 4060603560 | 2.97  | 6.93  | 2.04  | 3.18  | 2.75  | 0.066  | 0.017  | 0.033  | 0.154  | 0.059  |
| 4060603660 | NaN   | 0.50  | NaN   | -1.32 | -0.45 | NaN    | 0.017  | NaN    | -0.027 | -0.009 |
| 4060603790 | NaN   | 1.58  | 1.25  | NaN   | NaN   | NaN    | 0.043  | 0.049  | NaN    | NaN    |
| 4060606400 | 6.33  | 6.31  | 6.09  | 7.18  | 6.41  | 0.046  | 0.044  | 0.090  | 0.027  | 0.023  |
| 4060607260 | 1.97  | 2.78  | 2.23  | 1.03  | 1.95  | 0.059  | 0.077  | 0.082  | 0.035  | 0.043  |
| 4060607420 | 0.61  | 1.05  | 0.87  | NaN   | NaN   | 0.023  | 0.032  | 0.043  | NaN    | NaN    |
| 4060609110 | 1.52  | 2.29  | 1.79  | NaN   | 1.56  | 0.034  | 0.059  | 0.057  | NaN    | 0.025  |
| 4060609270 | 0.69  | 1.63  | 1.05  | NaN   | NaN   | 0.013  | 0.026  | 0.025  | NaN    | NaN    |
| 4060614190 | 4.90  | 7.64  | 5.33  | 4.64  | 4.72  | 0.082  | 0.020  | 0.066  | 0.175  | 0.064  |
| 4060614330 | 8.44  | 5.60  | 6.30  | 9.90  | 6.76  | 0.156  | 0.015  | 0.079  | 0.419  | 0.109  |
| 4060619030 | NaN   | 1.34  | 0.82  | NaN   | 2.07  | NaN    | 0.032  | 0.025  | NaN    | 0.024  |
| 4060619040 | 0.55  | 0.43  | NaN   | 0.70  | 1.33  | 0.015  | 0.014  | NaN    | 0.010  | 0.026  |
| 4060620840 | 4.91  | 3.33  | 5.87  | 7.00  | NaN   | 0.075  | 0.009  | 0.065  | 0.228  | NaN    |
| 4060621070 | 5.71  | 4.02  | 3.05  | 7.05  | 4.61  | 0.113  | 0.011  | 0.040  | 0.313  | 0.085  |
| 4060623190 | 2.70  | 3.39  | 2.72  | 2.38  | 2.30  | 0.031  | 0.033  | 0.042  | 0.032  | 0.016  |
| 4060623270 | 1.91  | 2.81  | 2.09  | 0.73  | 1.48  | 0.049  | 0.082  | 0.074  | 0.016  | 0.022  |
| 4060625430 | 2.66  | -0.99 | -0.86 | 4.13  | 1.90  | 0.039  | -0.002 | -0.009 | 0.145  | 0.021  |
| 4060625490 | 3.08  | 5.11  | 2.99  | 3.32  | 2.37  | 0.072  | 0.022  | 0.061  | 0.145  | 0.060  |
| 4060625570 | 6.45  | 12.05 | 5.30  | 6.09  | 7.78  | 0.121  | 0.026  | 0.072  | 0.268  | 0.116  |
| 4060628060 | 7.42  | 5.28  | 5.91  | 9.11  | 5.07  | 0.122  | 0.015  | 0.068  | 0.322  | 0.080  |
| 4060628270 | 1.46  | 2.19  | 1.42  | NaN   | 1.25  | 0.023  | 0.042  | 0.032  | NaN    | 0.014  |
| 4060628280 | 5.75  | 2.59  | 1.45  | 7.12  | 5.82  | 0.115  | 0.007  | 0.018  | 0.320  | 0.112  |
| 4060628370 | 1.44  | 1.90  | 1.32  | 1.18  | 1.61  | 0.014  | 0.016  | 0.016  | 0.015  | 0.011  |
| 4060632940 | NaN   | NaN   | NaN   | NaN   | NaN   | NaN    | NaN    | NaN    | NaN    | NaN    |
| 4060633040 | NaN   | 0.51  | NaN   | -1.85 | 0.55  | NaN    | 0.011  | NaN    | -0.015 | 0.005  |
| 4060639900 | 4.73  | 5.57  | 5.27  | 4.25  | 4.72  | 0.024  | 0.019  | 0.021  | 0.045  | 0.011  |
| 4060639910 | 4.92  | 5.67  | 5.02  | 3.94  | 5.49  | 0.031  | 0.037  | 0.037  | 0.031  | 0.020  |
| 4060640110 | 2.44  | 2.98  | 2.21  | 2.11  | 2.16  | 0.031  | 0.051  | 0.037  | 0.023  | 0.013  |
| 4060640120 | 2.08  | 3.01  | NaN   | 2.72  | 0.88  | 0.013  | 0.012  | NaN    | 0.037  | 0.002  |
| 4060641250 | 2.54  | 1.73  | 1.77  | 4.03  | 3.26  | 0.103  | 0.073  | 0.098  | 0.160  | 0.082  |
| 4060641530 | 2.33  | 1.71  | 2.24  | NaN   | 3.24  | 0.135  | 0.114  | 0.183  | NaN    | 0.088  |
| 4060641800 | NaN   | NaN   | NaN   | -1.20 | NaN   | NaN    | NaN    | NaN    | -0.047 | NaN    |
| 4060642530 | 3.21  | 9.32  | 2.18  | 3.18  | 3.29  | 0.054  | 0.017  | 0.023  | 0.135  | 0.041  |
| 4060642770 | 1.79  | 8.30  | 1.25  | 1.84  | 1.14  | 0.035  | 0.018  | 0.016  | 0.090  | 0.017  |
| 4060646320 | 3.47  | 4.88  | 5.40  | 3.62  | 1.55  | 0.083  | 0.013  | 0.114  | 0.162  | 0.042  |
| 4060646500 | 10.96 | 11.40 | 10.30 | 12.10 | 9.44  | 0.278  | 0.034  | 0.211  | 0.591  | 0.271  |
| 4060656710 | 4.84  | 9.45  | 8.31  | 4.04  | 5.12  | 0.026  | 0.010  | 0.017  | 0.064  | 0.012  |
| 4060656800 | 7.40  | 10.50 | 10.91 | 6.92  | 6.18  | 0.045  | 0.015  | 0.023  | 0.128  | 0.014  |
| 4060660740 | -1.81 | 2.50  | -4.77 | -0.69 | -2.75 | -0.044 | 0.008  | -0.077 | -0.036 | -0.069 |
| 4060660750 | 2.64  | 5.68  | 2.97  | 3.00  | 1.41  | 0.071  | 0.018  | 0.067  | 0.156  | 0.042  |
| 4060680220 | 1.83  | 1.86  | 1.99  | 1.74  | 1.84  | 0.046  | 0.007  | 0.047  | 0.077  | 0.051  |
| 4060680470 | 0.90  | 1.82  | 1.74  | 0.28  | 1.11  | 0.027  | 0.008  | 0.049  | 0.015  | 0.034  |

---



---

|            |       |       |       |       |       |        |        |        |        |        |
|------------|-------|-------|-------|-------|-------|--------|--------|--------|--------|--------|
| 4060689270 | 6.27  | 3.20  | 6.45  | 6.57  | 5.61  | 0.034  | 0.004  | 0.012  | 0.108  | 0.011  |
| 4060689380 | 4.89  | 4.83  | 5.62  | 4.75  | 5.09  | 0.036  | 0.014  | 0.017  | 0.094  | 0.016  |
| 4060690000 | 6.32  | 15.07 | 9.53  | 5.10  | 8.72  | 0.043  | 0.024  | 0.019  | 0.108  | 0.022  |
| 4060690120 | 4.10  | 9.82  | 7.44  | 3.37  | 4.39  | 0.023  | 0.012  | 0.012  | 0.060  | 0.009  |
| 4060693040 | NaN   | NaN   | NaN   | NaN   | NaN   | NaN    | NaN    | NaN    | NaN    | NaN    |
| 4060705050 | 1.89  | 5.82  | 1.68  | 1.76  | 1.89  | 0.044  | 0.015  | 0.022  | 0.096  | 0.042  |
| 4060705180 | 1.84  | 9.07  | 3.58  | 1.21  | 1.45  | 0.043  | 0.026  | 0.047  | 0.068  | 0.032  |
| 4060709860 | 0.85  | 2.41  | -0.81 | 1.50  | 0.65  | 0.025  | 0.008  | -0.019 | 0.092  | 0.020  |
| 4060709980 | NaN   | NaN   | NaN   | 1.56  | NaN   | NaN    | NaN    | NaN    | 0.022  | NaN    |
| 4060709990 | 5.94  | 6.00  | 6.67  | 5.80  | 4.45  | 0.054  | 0.070  | 0.066  | 0.061  | 0.020  |
| 4060710060 | 0.58  | 3.33  | -1.06 | 1.06  | 0.44  | 0.019  | 0.010  | -0.025 | 0.076  | 0.015  |
| 4060714700 | 4.48  | 2.81  | 2.81  | 6.26  | 2.75  | 0.031  | 0.018  | 0.014  | 0.085  | 0.008  |
| 4060714850 | 6.45  | 6.83  | 7.12  | 6.84  | 3.93  | 0.044  | 0.050  | 0.036  | 0.072  | 0.016  |
| 4060716340 | 6.21  | 1.55  | 4.92  | 8.30  | 3.37  | 0.032  | 0.005  | 0.014  | 0.098  | 0.008  |
| 4060716480 | 3.74  | 6.05  | 6.02  | 2.60  | 2.64  | 0.030  | 0.037  | 0.027  | 0.044  | 0.012  |
| 4060718180 | NaN   | 3.06  | 1.44  | NaN   | -1.58 | NaN    | 0.013  | 0.022  | NaN    | -0.041 |
| 4060718400 | 3.51  | 7.35  | 3.08  | 3.67  | 2.85  | 0.092  | 0.023  | 0.045  | 0.233  | 0.067  |
| 4060729320 | 2.34  | 1.49  | 1.95  | 2.82  | 3.97  | 0.126  | 0.085  | 0.133  | 0.170  | 0.114  |
| 4060729330 | -1.62 | -1.01 | -1.25 | -3.08 | -1.27 | -0.065 | -0.052 | -0.065 | -0.119 | -0.024 |
| 4060729700 | -0.57 | 1.24  | 1.36  | -2.24 | NaN   | -0.030 | 0.053  | 0.059  | -0.228 | NaN    |
| 4060729890 | -0.66 | 0.56  | 0.51  | -2.31 | NaN   | -0.021 | 0.018  | 0.016  | -0.116 | NaN    |
| 4060730280 | 0.73  | 8.07  | 0.97  | 0.29  | 1.01  | 0.017  | 0.018  | 0.011  | 0.016  | 0.022  |
| 4060730290 | 3.09  | 6.61  | 3.25  | 2.98  | 3.02  | 0.074  | 0.012  | 0.042  | 0.176  | 0.065  |
| 4060730580 | 3.64  | 2.20  | 3.03  | 4.28  | 2.19  | 0.036  | 0.009  | 0.011  | 0.109  | 0.012  |
| 4060730760 | 11.35 | 17.52 | 18.96 | 5.87  | 10.36 | 0.089  | 0.131  | 0.095  | 0.085  | 0.045  |
| 4060738860 | 1.01  | 0.85  | NaN   | 1.89  | 0.42  | 0.038  | 0.004  | NaN    | 0.136  | 0.016  |
| 4060738870 | 2.53  | 5.63  | 1.70  | 2.95  | 2.12  | 0.068  | 0.016  | 0.044  | 0.157  | 0.052  |
| 4060742930 | 4.84  | 4.08  | 6.22  | 5.17  | 2.92  | 0.045  | 0.015  | 0.017  | 0.133  | 0.015  |
| 4060743070 | 2.50  | 4.38  | 4.61  | 2.59  | -0.80 | 0.021  | 0.021  | 0.014  | 0.053  | -0.004 |
| 4060745580 | 3.66  | 5.84  | 3.13  | 3.86  | 3.29  | 0.070  | 0.010  | 0.037  | 0.173  | 0.059  |
| 4060745590 | 5.82  | 9.46  | 5.69  | 5.77  | 5.77  | 0.131  | 0.014  | 0.066  | 0.335  | 0.109  |
| 4060746370 | NaN   | NaN   | NaN   | NaN   | NaN   | NaN    | NaN    | NaN    | NaN    | NaN    |
| 4060746500 | 2.15  | 4.24  | 0.74  | 2.35  | 2.18  | 0.051  | 0.008  | 0.008  | 0.140  | 0.048  |
| 4060746720 | 2.04  | 2.11  | 2.54  | 1.46  | 2.54  | 0.123  | 0.125  | 0.167  | 0.129  | 0.071  |
| 4060750870 | 3.35  | 5.63  | 3.98  | 3.21  | 3.11  | 0.088  | 0.018  | 0.047  | 0.219  | 0.068  |
| 4060751020 | 2.45  | 5.27  | 1.22  | 2.33  | 3.15  | 0.055  | 0.012  | 0.012  | 0.141  | 0.056  |
| 4060751770 | 4.13  | 9.73  | 6.64  | 3.34  | 4.64  | 0.090  | 0.024  | 0.066  | 0.195  | 0.075  |
| 4060751920 | 3.32  | 8.20  | 3.74  | 3.13  | 3.03  | 0.065  | 0.017  | 0.036  | 0.160  | 0.045  |
| 4060758850 | 0.58  | 4.29  | -1.19 | 1.03  | 0.44  | 0.018  | 0.012  | -0.025 | 0.073  | 0.014  |
| 4060758990 | -0.52 | 4.73  | -1.47 | -0.59 | -0.37 | -0.014 | 0.014  | -0.023 | -0.037 | -0.010 |
| 4060759490 | 2.15  | 1.93  | 0.82  | 2.59  | 1.63  | 0.042  | 0.003  | 0.008  | 0.129  | 0.025  |
| 4060759500 | 3.64  | 6.55  | 3.29  | 3.58  | 3.68  | 0.072  | 0.015  | 0.039  | 0.171  | 0.060  |
| 4060760950 | -1.64 | 0.58  | NaN   | -3.60 | -1.47 | -0.049 | 0.015  | NaN    | -0.189 | -0.021 |
| 4060760960 | -2.22 | NaN   | -0.82 | -3.71 | -2.02 | -0.071 | NaN    | -0.020 | -0.223 | -0.033 |

---

---

|            |       |       |       |       |       |        |        |        |        |        |
|------------|-------|-------|-------|-------|-------|--------|--------|--------|--------|--------|
| 4060765990 | NaN   | -0.80 | 1.10  | NaN   | NaN   | NaN    | -0.006 | 0.043  | NaN    | NaN    |
| 4060767740 | 4.65  | 1.86  | 6.43  | 4.70  | 4.98  | 0.047  | 0.005  | 0.017  | 0.143  | 0.022  |
| 4060767880 | 7.31  | 4.94  | 8.25  | 7.61  | 8.19  | 0.074  | 0.032  | 0.033  | 0.189  | 0.038  |
| 4060769230 | -0.97 | -4.95 | -2.24 | 0.67  | -1.04 | -0.029 | -0.058 | -0.066 | 0.035  | -0.029 |
| 4060769470 | 1.27  | NaN   | NaN   | 2.05  | NaN   | 0.090  | NaN    | NaN    | 0.218  | NaN    |
| 4060769810 | NaN   | 5.83  | 13.14 | NaN   | NaN   | NaN    | 0.010  | 0.018  | NaN    | NaN    |
| 4060770100 | 5.19  | 9.71  | 13.18 | 3.24  | 7.38  | 0.057  | 0.052  | 0.039  | 0.098  | 0.040  |
| 4060778530 | 2.70  | 4.67  | 8.04  | 2.18  | 3.06  | 0.037  | 0.013  | 0.022  | 0.093  | 0.021  |
| 4060778570 | 1.67  | NaN   | 3.11  | 1.50  | 1.23  | 0.035  | 0.006  | 0.027  | 0.088  | 0.018  |
| 4060778660 | 0.65  | 11.19 | 12.68 | -0.84 | 1.94  | 0.010  | 0.039  | 0.026  | -0.040 | 0.014  |
| 4060778700 | 2.32  | 7.24  | 3.18  | 2.09  | 2.12  | 0.052  | 0.010  | 0.036  | 0.123  | 0.039  |
| 4060779790 | NaN   | NaN   | NaN   | NaN   | NaN   | NaN    | NaN    | NaN    | NaN    | NaN    |
| 4060780100 | -0.77 | -1.94 | -0.75 | -0.43 | -1.24 | -0.039 | -0.016 | -0.036 | -0.042 | -0.063 |
| 4060780120 | -0.42 | -3.63 | NaN   | -0.37 | -0.57 | -0.015 | -0.017 | NaN    | -0.025 | -0.019 |
| 4060783910 | 1.59  | -0.85 | -0.70 | 2.43  | 0.96  | 0.048  | -0.003 | -0.011 | 0.176  | 0.027  |
| 4060784050 | 3.21  | 5.54  | 2.96  | 3.23  | 3.21  | 0.114  | 0.013  | 0.080  | 0.259  | 0.100  |
| 4060784170 | 1.82  | -1.56 | NaN   | 2.57  | 1.38  | 0.037  | -0.004 | NaN    | 0.126  | 0.022  |
| 4060784200 | 4.09  | 8.42  | 4.90  | 3.69  | 3.86  | 0.127  | 0.024  | 0.128  | 0.250  | 0.102  |
| 4060784890 | 2.55  | NaN   | 5.63  | 2.26  | 2.47  | 0.041  | 0.006  | 0.020  | 0.116  | 0.021  |
| 4060785160 | 2.74  | NaN   | 6.44  | 2.42  | 3.01  | 0.030  | 0.007  | 0.010  | 0.088  | 0.016  |
| 4060786460 | 4.94  | NaN   | 7.26  | 4.45  | 5.26  | 0.084  | 0.008  | 0.043  | 0.211  | 0.073  |
| 4060786650 | 3.01  | NaN   | 5.37  | 2.46  | 3.50  | 0.053  | 0.008  | 0.037  | 0.121  | 0.044  |
| 4060786990 | 2.75  | NaN   | 5.04  | 2.49  | 2.04  | 0.046  | 0.007  | 0.035  | 0.115  | 0.026  |
| 4060787180 | 3.36  | NaN   | 8.43  | 2.77  | 4.92  | 0.053  | 0.004  | 0.022  | 0.141  | 0.045  |
| 4060787190 | 5.05  | NaN   | 6.95  | 4.73  | 5.84  | 0.068  | 0.002  | 0.020  | 0.197  | 0.052  |
| 4060787380 | 4.13  | 2.07  | 5.75  | 4.12  | 4.19  | 0.063  | 0.005  | 0.018  | 0.198  | 0.029  |
| 4060787490 | 4.61  | 10.50 | 13.14 | 2.90  | 6.66  | 0.044  | 0.033  | 0.030  | 0.081  | 0.032  |
| 4060787520 | -1.61 | NaN   | 2.54  | -1.90 | -1.83 | -0.023 | 0.003  | 0.007  | -0.087 | -0.015 |
| 4060787530 | 4.34  | NaN   | 7.76  | 3.75  | 5.60  | 0.084  | 0.004  | 0.036  | 0.221  | 0.074  |
| 4060787650 | 1.10  | 13.57 | 5.52  | NaN   | 1.73  | 0.009  | 0.014  | 0.017  | NaN    | 0.009  |
| 4060788280 | 4.84  | NaN   | 7.79  | 4.10  | 5.74  | 0.070  | 0.009  | 0.041  | 0.168  | 0.061  |
| 4060788290 | 0.93  | NaN   | 3.44  | NaN   | 0.80  | 0.008  | 0.006  | 0.009  | NaN    | 0.004  |
| 4060799160 | 0.73  | 1.88  | 2.84  | NaN   | 0.92  | 0.030  | 0.032  | 0.049  | NaN    | 0.020  |
| 4060799260 | -2.31 | -1.07 | -2.62 | -2.55 | -2.23 | -0.066 | -0.017 | -0.046 | -0.163 | -0.036 |
| 4060801370 | 2.86  | 2.80  | 3.66  | 2.63  | 2.65  | 0.175  | 0.026  | 0.187  | 0.331  | 0.152  |
| 4060806680 | 0.85  | 2.06  | 2.40  | NaN   | 0.94  | 0.034  | 0.062  | 0.072  | NaN    | 0.017  |
| 4060806930 | -0.79 | 1.27  | NaN   | -1.35 | -0.54 | -0.031 | 0.018  | NaN    | -0.133 | -0.013 |
| 4060811130 | 2.40  | 4.05  | 2.09  | 2.27  | 2.67  | 0.055  | 0.014  | 0.031  | 0.115  | 0.057  |
| 4060811140 | 0.75  | -6.75 | -2.98 | 2.48  | 1.05  | 0.017  | -0.030 | -0.050 | 0.129  | 0.019  |
| 4060815410 | NaN   | NaN   | -0.77 | 0.65  | NaN   | NaN    | NaN    | -0.038 | 0.036  | NaN    |
| 4060815490 | 1.51  | 2.22  | 1.13  | 1.50  | 1.92  | 0.084  | 0.059  | 0.101  | 0.103  | 0.072  |
| 4060816630 | 4.21  | 8.46  | 7.17  | 3.48  | 4.75  | 0.038  | 0.021  | 0.015  | 0.092  | 0.022  |
| 4060816640 | 2.33  | 18.95 | 13.34 | NaN   | 2.90  | 0.021  | 0.042  | 0.032  | NaN    | 0.016  |
| 4060818150 | NaN   | NaN   | -3.14 | -2.05 | NaN   | NaN    | NaN    | -0.029 | -0.066 | NaN    |

---

---

|            |       |       |       |       |       |        |        |        |        |        |
|------------|-------|-------|-------|-------|-------|--------|--------|--------|--------|--------|
| 4060818360 | 1.83  | NaN   | NaN   | 1.89  | 2.36  | 0.093  | NaN    | NaN    | 0.197  | 0.108  |
| 4060818780 | 0.31  | 0.92  | NaN   | 0.28  | 0.43  | 0.008  | 0.003  | NaN    | 0.018  | 0.011  |
| 4060818790 | 3.26  | -1.78 | 2.54  | 3.70  | 3.42  | 0.096  | -0.008 | 0.044  | 0.268  | 0.079  |
| 4060820560 | 2.46  | NaN   | NaN   | 3.04  | NaN   | 0.022  | NaN    | NaN    | 0.072  | NaN    |
| 4060820850 | 10.90 | 16.84 | 13.09 | 9.25  | 11.98 | 0.187  | 0.081  | 0.132  | 0.365  | 0.168  |
| 4060826770 | NaN   | NaN   | NaN   | NaN   | NaN   | NaN    | NaN    | NaN    | NaN    | NaN    |
| 4060826780 | NaN   | NaN   | NaN   | NaN   | NaN   | NaN    | NaN    | NaN    | NaN    | NaN    |
| 4060827540 | 1.41  | 3.07  | 1.76  | NaN   | 1.98  | 0.131  | 0.111  | 0.238  | NaN    | 0.113  |
| 4060827660 | 0.82  | 1.70  | 1.31  | NaN   | 1.55  | 0.055  | 0.036  | 0.104  | NaN    | 0.068  |
| 4060828450 | 2.44  | 2.76  | 3.49  | 1.95  | 2.53  | 0.091  | 0.011  | 0.116  | 0.154  | 0.083  |
| 4060828460 | -0.27 | -2.52 | NaN   | NaN   | -0.99 | -0.011 | -0.010 | NaN    | NaN    | -0.036 |
| 4060835610 | -0.61 | NaN   | -0.81 | -0.79 | NaN   | -0.069 | NaN    | -0.125 | -0.131 | NaN    |
| 4060836060 | 2.12  | 2.96  | 4.00  | 0.78  | 2.57  | 0.269  | 0.097  | 0.581  | 0.194  | 0.202  |
| 4060836200 | NaN   | 1.28  | NaN   | -0.48 | NaN   | NaN    | 0.038  | NaN    | -0.085 | NaN    |
| 4060836210 | NaN   | 1.29  | NaN   | -0.52 | NaN   | NaN    | 0.018  | NaN    | -0.063 | NaN    |
| 4060836400 | 2.10  | 4.07  | 2.81  | 1.30  | 2.56  | 0.229  | 0.102  | 0.343  | 0.274  | 0.193  |
| 4060837170 | 2.17  | 3.09  | 2.84  | 2.17  | 1.37  | 0.072  | 0.028  | 0.062  | 0.156  | 0.040  |
| 4060837180 | 0.58  | -2.44 | 0.74  | 0.92  | NaN   | 0.024  | -0.010 | 0.019  | 0.091  | NaN    |
| 4060838850 | 0.48  | 2.27  | 0.50  | NaN   | 0.71  | 0.046  | 0.090  | 0.053  | NaN    | 0.054  |
| 4060839030 | 3.20  | 7.70  | 2.85  | 2.45  | 3.67  | 0.625  | 0.480  | 0.782  | 0.781  | 0.451  |
| 4060840120 | -0.72 | 1.12  | 0.95  | -1.99 | NaN   | -0.024 | 0.029  | 0.021  | -0.138 | NaN    |
| 4060859640 | -2.85 | -2.68 | -3.84 | -2.54 | -2.68 | -0.215 | -0.068 | -0.239 | -0.407 | -0.143 |
| 4060859650 | -3.77 | -2.12 | -4.44 | -3.94 | -3.00 | -0.120 | -0.016 | -0.105 | -0.294 | -0.062 |
| 4060863940 | -1.74 | 0.86  | -0.83 | -2.11 | -1.98 | -0.072 | 0.010  | -0.016 | -0.228 | -0.053 |
| 4060863950 | -5.23 | -4.76 | -5.75 | -5.21 | -5.15 | -0.191 | -0.137 | -0.181 | -0.317 | -0.126 |
| 4060866220 | -2.85 | -1.43 | -3.20 | -2.95 | -2.52 | -0.152 | -0.013 | -0.107 | -0.394 | -0.090 |
| 4060869520 | -1.44 | -2.97 | NaN   | -1.38 | -2.36 | -0.077 | -0.024 | NaN    | -0.149 | -0.127 |
| 4060869640 | 3.47  | 2.32  | 4.09  | 3.42  | 3.35  | 0.163  | 0.021  | 0.138  | 0.308  | 0.184  |
| 4060872230 | NaN   | NaN   | NaN   | -0.93 | NaN   | NaN    | NaN    | NaN    | -0.184 | NaN    |
| 4060872820 | 3.55  | 2.65  | 4.35  | 3.78  | 2.82  | 0.160  | 0.018  | 0.092  | 0.395  | 0.132  |
| 4060876090 | NaN   | NaN   | NaN   | NaN   | NaN   | NaN    | NaN    | NaN    | NaN    | NaN    |
| 4060876180 | NaN   | NaN   | NaN   | NaN   | NaN   | NaN    | NaN    | NaN    | NaN    | NaN    |
| 4060883570 | NaN   | 4.16  | NaN   | NaN   | NaN   | NaN    | 0.040  | NaN    | NaN    | NaN    |
| 4060886350 | NaN   | 6.95  | NaN   | NaN   | NaN   | NaN    | 0.081  | NaN    | NaN    | NaN    |
| 4060900670 | -1.98 | NaN   | -1.08 | -2.63 | -1.44 | -0.111 | NaN    | -0.037 | -0.354 | -0.056 |
| 4060900680 | NaN   | NaN   | NaN   | NaN   | NaN   | NaN    | NaN    | NaN    | NaN    | NaN    |
| 4060900840 | -2.03 | 1.60  | -1.42 | -2.97 | -1.69 | -0.087 | 0.031  | -0.037 | -0.293 | -0.046 |
| 4060902890 | 1.20  | NaN   | NaN   | 1.47  | 1.37  | 0.150  | NaN    | NaN    | 0.337  | 0.130  |
| 4060903190 | -2.07 | -0.90 | -1.93 | -2.50 | -1.84 | -0.195 | -0.036 | -0.181 | -0.431 | -0.127 |
| 4060905060 | -1.40 | 0.74  | -1.34 | -1.80 | -1.25 | -0.050 | 0.010  | -0.030 | -0.152 | -0.027 |
| 4060905860 | NaN   | -2.80 | -1.19 | 0.82  | -0.33 | NaN    | -0.030 | -0.030 | 0.050  | -0.008 |
| 4060905950 | 2.82  | 3.44  | 2.58  | 2.85  | 2.79  | 0.092  | 0.023  | 0.051  | 0.210  | 0.083  |
| 4060933190 | 1.42  | 3.84  | 2.52  | 1.25  | NaN   | 0.056  | 0.021  | 0.050  | 0.113  | NaN    |
| 4060956230 | -2.70 | -1.00 | -2.21 | -3.75 | -2.48 | -0.201 | -0.058 | -0.129 | -0.490 | -0.122 |

---

---

|            |      |      |      |     |      |       |       |       |     |       |
|------------|------|------|------|-----|------|-------|-------|-------|-----|-------|
| 4060956240 | NaN  | NaN  | NaN  | NaN | NaN  | NaN   | NaN   | NaN   | NaN | NaN   |
| 4060972010 | 0.60 | 1.53 | 0.48 | NaN | 0.88 | 0.041 | 0.048 | 0.035 | NaN | 0.042 |

---
